# Supplementary material
Source: PubMed Central journal article supplement (PMC5971591)
Supplement: AAC.00238-18_zac006187216s1.pdf [file AAC.00238-18_zac006187216s1.pdf]

Table S1. MICs and *FKSI* profiles of *C. auris* isolates.

\*16: 'Eagle effect' up to 16 mg/l

\*\* : growth in the whole range of drug concentrations, no possibility to read MIC

|       |                    | MIC [mg/l] |       |          |          |       |       | <i>FKSI</i> |
|-------|--------------------|------------|-------|----------|----------|-------|-------|-------------|
|       |                    | ANF        |       | CAS      |          | MCF   |       |             |
|       |                    | 24 h       | 48 h  | 24 h     | 48 h     | 24 h  | 48 h  |             |
| India | VPCI 669/P/12      | 0.5        | 1     | 0.25/*16 | >16**    | 0.125 | 0.25  | WT          |
|       | VPCI 671/P/12      | 0.5        | 0.5   | 0.25/*16 | >16**    | 0.125 | 0.25  | WT          |
|       | VPCI 674/P/12      | 0.5        | 0.5   | 0.25/*16 | 0.25/*16 | 0.06  | 0.125 | WT          |
|       | VPCI 683/P/12      | 0.5        | 1     | 0.25/*16 | >16**    | 0.125 | 0.25  | WT          |
|       | VPCI 692/P/12      | 0.5        | 1     | 0.25/*16 | >16**    | 0.125 | 0.25  | WT          |
|       | VPCI 712/P/12      | 0.25       | 0.5   | 0.25/*16 | 0.25/*16 | 0.125 | 0.125 | WT          |
|       | VPCI 471/P/13      | 0.5        | 0.5   | 1/*16    | >16**    | 0.25  | 0.25  | WT          |
|       | VPCI 475/P/13      | 0.5        | 0.5   | 0.25/*16 | 0.25/*16 | 0.125 | 0.25  | WT          |
|       | VPCI 478/P/13      | 0.25       | 0.25  | 0.25/*16 | >16**    | 0.125 | 0.125 | WT          |
|       | VPCI 479/P/13      | 0.25       | 0.25  | 0.5/*16  | >16**    | 0.125 | 0.125 | WT          |
|       | VPCI 480/P/13      | 0.25       | 0.25  | 0.5/*16  | >16**    | 0.125 | 0.125 | WT          |
|       | VPCI 482/P/13      | 0.25       | 0.25  | 0.5/*16  | >16**    | 0.125 | 0.125 | WT          |
|       | VPCI 483/P/13      | 0.25       | 0.25  | 0.25/*16 | 0.25/*16 | 0.125 | 0.125 | WT          |
|       | VPCI 1130/P/13     | 0.125      | 0.125 | 0.5/*16  | 0.5/*16  | 0.125 | 0.125 | WT          |
|       | VPCI 1132/P/13     | 0.125      | 0.125 | 0.5/*16  | 0.5/*16  | 0.125 | 0.125 | WT          |
|       | VPCI 1133/P/13 - S | 0.125      | 0.125 | 0.5/*16  | 1/ *16   | 0.125 | 0.25  | WT          |
|       | VPCI 1133/P/13 - R | >16        | >16   | 16       | >16      | 16    | >16   | S639F       |

|                    |       |       |           |           |       |       |       |
|--------------------|-------|-------|-----------|-----------|-------|-------|-------|
| VPCI 105/P/14      | 0.5   | 0.5   | 0.5/*16   | 1/*16     | 0.125 | 0.125 | WT    |
| VPCI 107/P/14      | 0.125 | 0.125 | 0.25/*16  | 0.5/*16   | 0.06  | 0.06  | WT    |
| VPCI 510/P/14      | 0.125 | 0.125 | 0.5/*16   | >16**     | 0.125 | 0.125 | WT    |
| VPCI 511/P/14      | 0.125 | 0.125 | 0.5/*16   | >16**     | 0.125 | 0.125 | WT    |
| VPCI 512/P/14      | 0.125 | 0.125 | 0.5/*16   | 1/*16     | 0.125 | 0.125 | WT    |
| VPCI 513/P/14      | 0.5   | 0.5   | 1/*16     | >16**     | 0.125 | 0.25  | WT    |
| VPCI 514/P/14      | 0.125 | 0.125 | 0.5/*16   | 1/*16     | 0.25  | 0.25  | WT    |
| VPCI 250/P/14      | 0.125 | 0.125 | 0.5/*16   | 0.5/*16   | 0.125 | 0.125 | WT    |
| VPCI 265/P/14      | 16    | 16    | 8         | >16       | 16    | >16   | S639F |
| VPCI 266/P/14      | 0.125 | 0.125 | 0.125/*16 | 0.125/*16 | 0.125 | 0.125 | WT    |
| VPCI 462/P/14      | >16   | >16   | 8         | >16       | 16    | >16   | S639F |
| VPCI 463/P/14      | 0.125 | 0.125 | 0.5/*16   | 0.5/*16   | 0.125 | 0.125 | WT    |
| VPCI 467/P/14      | 0.125 | 0.125 | 0.125/*16 | 0.5/*16   | 0.25  | 0.25  | WT    |
| VPCI 471a/P/14 - S | 0.125 | 0.125 | 0.5/*16   | 1/*16     | 0.25  | 0.25  | WT    |
| VPCI 471a/P/14 - R | 4     | 16    | 8         | 16        | 16    | >16   | S639F |
| VPCI 478/P/14      | 0.125 | 0.25  | 1/*16     | 2/*16     | 0.5   | 0.5   | WT    |
| VPCI 518/P/14      | 0.5   | 1     | 0.5/*16   | >16**     | 0.25  | 0.5   | WT    |
| VPCI 550/P/14      | 0.5   | 1     | 0.25/*16  | 0.25/*16  | 0.25  | 0.5   | WT    |
| VPCI 714/P/14      | 0.5   | 0.5   | 0.5/*16   | >16**     | 0.125 | 0.25  | WT    |
| VPCI 717/P/14      | 0.125 | 0.125 | 0.5/*16   | >16**     | 0.125 | 0.125 | WT    |
| VPCI 1060/P/14     | 0.5   | 0.5   | 0.5/*16   | >16**     | 0.25  | 0.25  | WT    |
| VPCI 74/P/15       | 0.5   | 0.5   | 0.5/*16   | >16**     | 0.25  | 0.25  | WT    |
| VPCI 213/P/15      | 0.25  | 0.5   | 0.5/*16   | >16**     | 0.25  | 0.25  | WT    |

## Colombia

|         |       |       |           |          |       |       |    |
|---------|-------|-------|-----------|----------|-------|-------|----|
| B11800  | 0.06  | 0.06  | 0.25/*16  | 0.25/*16 | 0.125 | 0.125 | WT |
| B11801  | 0.06  | 0.06  | 0.5/*16   | 1/*16    | 0.125 | 0.125 | WT |
| B11802  | 0.06  | 0.06  | 0.25/*16  | 0.25/*16 | 0.125 | 0.125 | WT |
| B11804  | 0.06  | 0.06  | 0.25/*16  | 0.25/*16 | 0.25  | 0.25  | WT |
| B11805  | 0.06  | 0.06  | 0.25/*16  | 0.5/*16  | 0.125 | 0.125 | WT |
| B11806  | 0.06  | 0.06  | 0.25/*16  | 0.5/*16  | 0.125 | 0.125 | WT |
| 2324866 | 0.5   | 0.5   | 0.25/*16  | 0.5/*16  | 0.5   | 0.5   | WT |
| C45329  | 0.5   | 0.5   | 0.25/*16  | 0.5/*16  | 0.125 | 0.25  | WT |
| 2321573 | 0.5   | 0.5   | 0.25/*16  | 0.5/*16  | 0.25  | 0.25  | WT |
| A106871 | 0.125 | 0.25  | 0.125     | 0.25/*16 | 0.125 | 0.25  | WT |
| C46772  | 0.125 | 0.125 | 0.125/*16 | 0.25/*16 | 0.06  | 0.06  | WT |
| 2325805 | 0.5   | 1     | 0.5/*16   | 1/*16    | 0.25  | 0.5   | WT |
| C56237  | 0.5   | 1     | 0.25/*16  | 0.5/*16  | 0.25  | 0.5   | WT |
| 2326512 | 0.5   | 1     | 0.25/*16  | 0.5/*16  | 0.5   | 1     | WT |
| C60460  | 0.5   | 1     | 0.25/*16  | 0.5/*16  | 0.25  | 0.5   | WT |
| C48406  | 0.125 | 0.25  | 0.25/*16  | 0.5/*16  | 0.06  | 0.06  | WT |
| C46052  | 0.5   | 1     | 0.25/*16  | 0.5/*16  | 0.125 | 0.5   | WT |
| C58960  | 0.5   | 0.5   | 0.25/*16  | 0.5/*16  | 0.125 | 0.25  | WT |
| C60318  | 0.5   | 0.5   | 0.5/*16   | 1/*16    | 0.25  | 0.5   | WT |
| 2274737 | 1     | 1     | 0.5/*16   | 1/*16    | 0.5   | 1     | WT |
| A110602 | 1     | 2     | 0.5/*16   | 1/*16    | 0.5   | 1/*16 | WT |
| C46052  | 0.25  | 0.25  | 0.25/*16  | 0.5/*16  | 0.125 | 0.25  | WT |
| C48406  | 0.125 | 0.25  | 0.25/*16  | 0.5/*16  | 0.125 | 0.125 | WT |

|         |       |       |          |          |       |       |    |
|---------|-------|-------|----------|----------|-------|-------|----|
| C47129  | 0.125 | 0.125 | 0.25/*16 | 0.25/*16 | 0.06  | 0.125 | WT |
| C56029  | 0.25  | 0.25  | 0.25/*16 | 0.5/*16  | 0.125 | 0.125 | WT |
| C48621  | 0.25  | 0.5   | 0.25/*16 | 0.5/*16  | 0.125 | 0.25  | WT |
| D26413  | 0.5   | 1     | 0.5/*16  | 0.5/*16  | 0.25  | 0.5   | WT |
| C59545  | 0.125 | 0.125 | 0.25     | 0.25/*16 | 0.06  | 0.125 | WT |
| C48374  | 0.5   | 1     | 0.25/*16 | 0.5/*16  | 0.25  | 0.5   | WT |
| C48477  | 0.25  | 0.25  | 0.25/*16 | 0.5/*16  | 0.125 | 0.125 | WT |
| C55038  | 0.5   | 0.5   | 0.25/*16 | 0.5/*16  | 0.25  | 0.25  | WT |
| C57272  | 0.5   | 0.5   | 0.25/*16 | 0.5/*16  | 0.25  | 0.25  | WT |
| C60470  | 0.5   | 0.5   | 0.25/*16 | 0.5/*16  | 0.25  | 0.5   | WT |
| C52043  | 0.5   | 0.5   | 0.25/*16 | 0.5/*16  | 0.25  | 0.5   | WT |
| 2328966 | 0.25  | 0.5   | 0.25/*16 | 0.5/*16  | 0.125 | 0.25  | WT |
| C48602  | 0.125 | 0.125 | 0.25/*16 | 0.25/*16 | 0.06  | 0.125 | WT |
| C49302  | 0.25  | 0.25  | 0.25/*16 | 0.5/*16  | 0.125 | 0.25  | WT |
| C47753  | 0.5   | 1     | 0.5/*16  | 1/*16    | 0.25  | 0.5   | WT |
| C48117  | 1     | 1/*16 | 0.5/*16  | 1/*16    | 0.5   | 1/*16 | WT |
| C48320  | 0.5   | 0.5   | 0.25/*16 | 0.5/*16  | 0.125 | 0.25  | WT |
| C54019  | 0.25  | 0.25  | 0.25/*16 | 0.5/*16  | 0.125 | 0.25  | WT |
| C48477  | 0.25  | 0.25  | 0.25/*16 | 0.5/*16  | 0.06  | 0.125 | WT |
| C57942  | 0.5   | 0.5   | 0.5/*16  | 1/*16    | 0.25  | 0.5   | WT |
| C59629  | 0.25  | 0.25  | 0.25/*16 | 0.5/*16  | 0.125 | 0.25  | WT |
| C45563  | 0.5   | 0.5   | 0.25/*16 | 0.5/*16  | 0.25  | 0.25  | WT |
| C58960  | 0.5   | 0.5   | 0.25/*16 | 0.5/*16  | 0.25  | 0.25  | WT |

AR Bank

|         |       |       |           |           |       |       |    |
|---------|-------|-------|-----------|-----------|-------|-------|----|
| C52710  | 0.5   | 0.5   | 0.25/*16  | 0.5/*16   | 0.25  | 0.25  | WT |
| C48522  | 0.125 | 0.125 | 0.125/*16 | 0.25/*16  | 0.06  | 0.06  | WT |
| C60912  | 0.5   | 1     | 0.5/*16   | 0.5/*16   | 0.25  | 0.5   | WT |
| C60470  | 0.5   | 1     | 0.5/*16   | 1/*16     | 0.25  | 0.5   | WT |
| C47129  | 0.25  | 0.25  | 0.25/*16  | 0.5/*16   | 0.06  | 0.06  | WT |
| C60920  | 1     | 1     | 0.5/*16   | 0.5/*16   | 0.5   | 1/*16 | WT |
| C47103  | 0.5   | 0.5   | 0.25/*16  | 0.5/*16   | 0.25  | 0.5   | WT |
| 2323170 | 0.5   | 0.5   | 0.5/*16   | 1/*16     | 0.5   | 1     | WT |
| 2326513 | 0.5   | 1     | 0.5/*16   | 1/*16     | 0.5   | 1     | WT |
| C57506  | 0.5   | 0.5   | 0.5/*16   | 1/*16     | 0.25  | 0.25  | WT |
| AR-0381 | 0.03  | 0.03  | 0.125/*16 | 0.125/*16 | 0.03  | 0.06  | WT |
| AR-0382 | 0.5   | 1     | 0.25/*16  | 0.5/*16   | 0.25  | 0.25  | WT |
| AR-0383 | 1     | 1     | 0.5/*16   | 1/*16     | 0.25  | 1     | WT |
| AR-0384 | 1     | 1     | 0.5/*16   | 1/*16     | 0.25  | 0.5   | WT |
| AR-0385 | 0.5   | 1     | 0.5/*16   | 1/*16     | 0.125 | 0.25  | WT |
| AR-0386 | 0.5   | 1     | 0.5/*16   | 1/*16     | 0.125 | 0.25  | WT |
| AR-0387 | 1     | 1     | 0.5/*16   | 0.5/*16   | 0.25  | 0.5   | WT |
| AR-0388 | 1     | 1     | 0.5/*16   | 0.5/*16   | 0.25  | 0.5   | WT |
| AR-0389 | 1     | 1     | 0.5/*16   | 0.5/*16   | 0.25  | 0.25  | WT |
| AR-0390 | 0.25  | 0.5   | 0.25/*16  | 0.5/*16   | 0.125 | 0.25  | WT |

---
